# Supplementary material for: Magnetically recoverable ZrO2/Fe3O4/chitosan nanomaterials for enhanced sunlight driven photoreduction of carcinogenic Cr(vi) and dechlorination & mineralization of 4-chlorophenol from simulated waste water
Source: Royal Society of Chemistry journal article supplement (doi:10.1039/c5ra23372k), 2016-01-01
Supplement: c5ra23372k1.pdf [file c5ra23372k1.pdf]

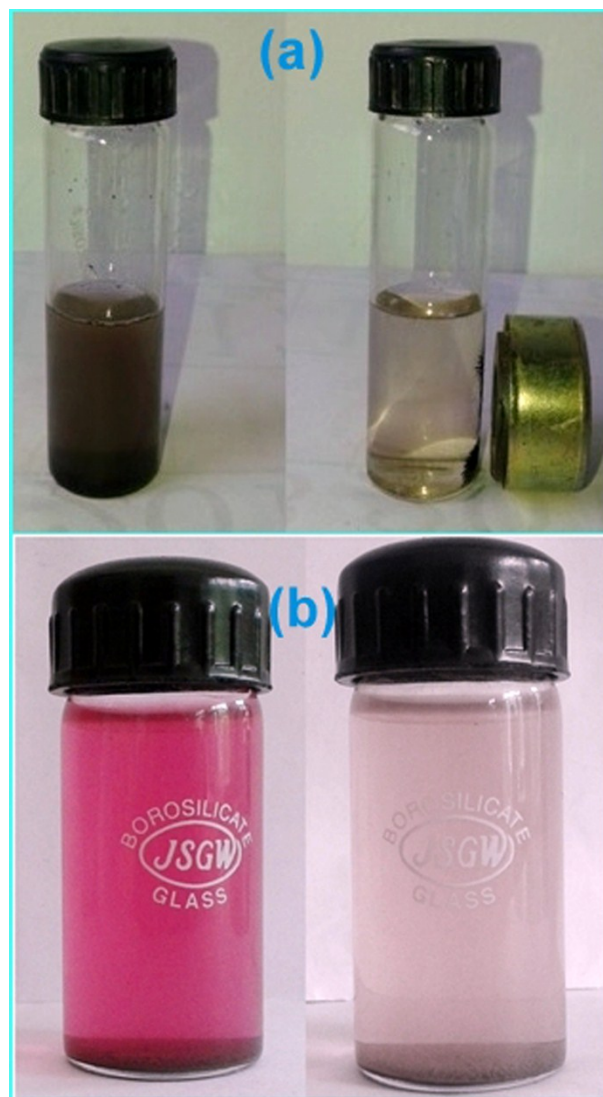

Fig S1: Digital photographs of magnetic separation and decolorisation of DPC-Cr(VI)

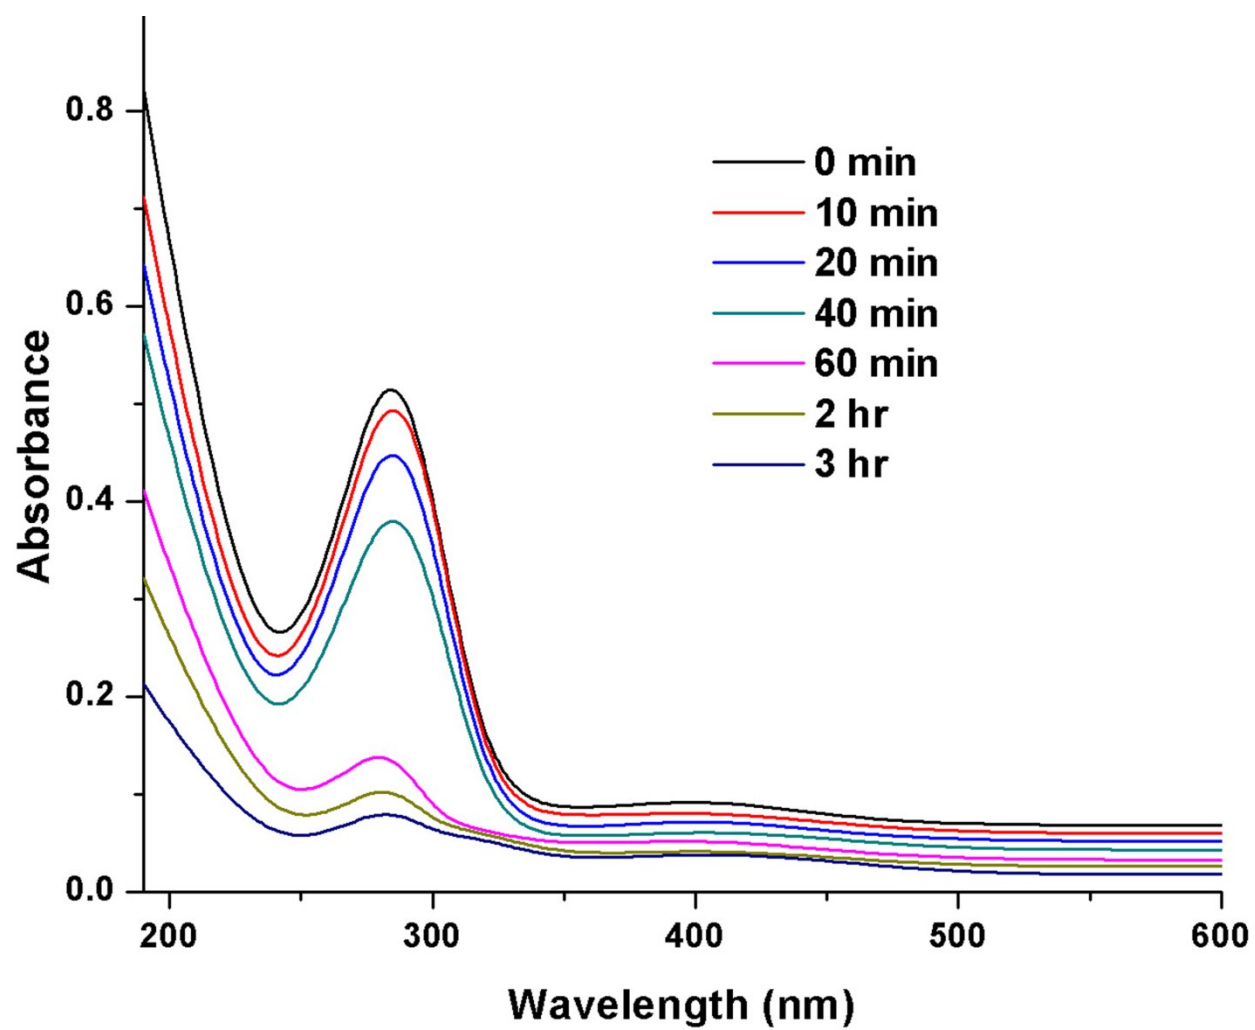

Fig S2: Absorbance spectrum of 4-CP with time in presence of ZFC under solar

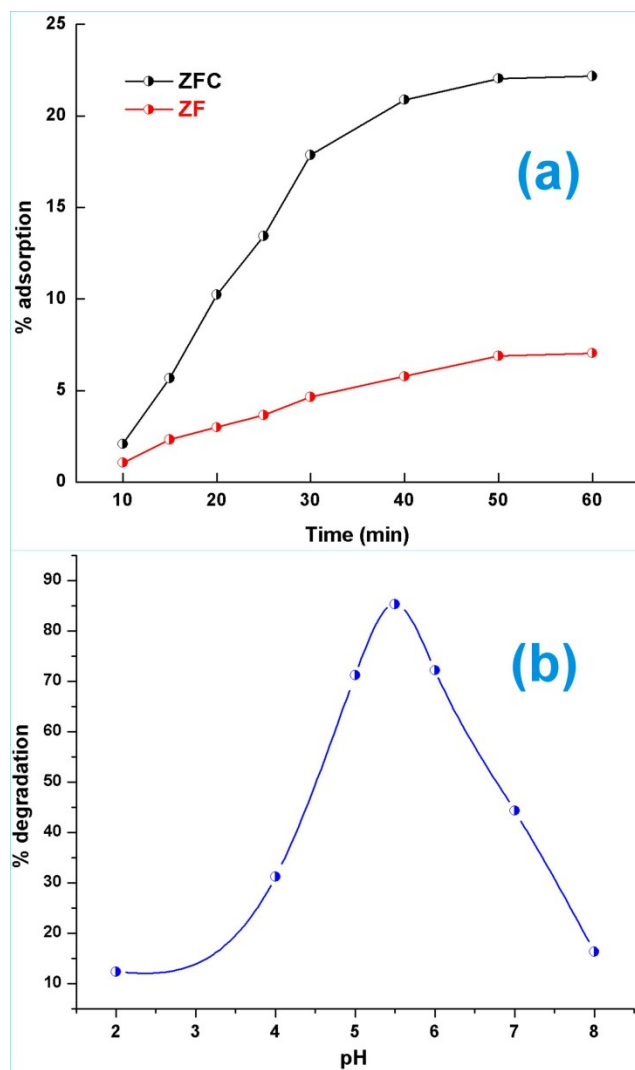

Fig S3 : (a) Adsorption of 4-CP onto ZF and ZFC in the dark experiment (b) Influence of initial pH on degradation of 4-CP in presence of ZFC under solar light
